# Supplementary material for: Human Adipose-Derived Stem/Stromal Cells Promote Proliferation and Migration in Head and Neck Cancer Cells
Source: MDPI journal article supplement (doi:10.3390/cancers13112751), 2021-06-01
Supplement: s1 [file s1]

Table S1: General patient characteristics

| Characteristics                                         |                   | Cohort ( <i>n</i> = 5) |
|---------------------------------------------------------|-------------------|------------------------|
| Gender                                                  | Male              | 60%                    |
|                                                         | Female            | 40%                    |
| Age at surgery [years]                                  |                   | 61.0±4.9               |
| Reason for local augmentation in the head and neck area | Dysphonia         | 80%                    |
|                                                         | Cervical scarring | 20%                    |
| Body Mass Index [kg/m <sup>2</sup> ]                    |                   | 26.6±2.1               |
| Cancer in patient history                               | Positive          | 60%                    |
| Coagulopathy (e.g. medication-related)                  | Positive          | 40%                    |
